# Supplementary material for: Machine learning the screening factor in the soft bond valence approach for rapid crystal structure estimation
Source: Royal Society of Chemistry journal article supplement (doi:10.1039/d4dd00152d), 2024-01-01
Supplement: d4dd00152d1.pdf [file d4dd00152d1.pdf]

## Supplementary material

### Machine learning the screening factor in the soft bond valence approach for rapid prescreening of ceramics

Keisuke Kamda, Takaaki Ariga, Kazuma Ito, Manabu Ihara<sup>1</sup> Sergei Manzhos<sup>2</sup>,

School of Materials and Chemical Technology, Tokyo Institute of Technology, Ookayama  
2-12-1, Meguro-ku, Tokyo 152-8552 Japan.

#### List of structures used

Structures taken from ICDD database [1] (version PDF-4+ 2020, accessed on 06. July. 2021) are marked with \*. All other structures were taken from Materials Project database [2], version v2021.05.13, accessed on 02. November. 2021 for perovskite structures and version v2021.11.10, accessed on 26. August. 2022 for spinel structures.

#### 1 List of perovskite structures used

| Material             | Database ID  | Material           | Database ID |
|----------------------|--------------|--------------------|-------------|
| BaCeO <sub>3</sub>   | mp-5663      | LaGaO <sub>3</sub> | mp-1097026  |
| BaCoO <sub>3</sub>   | mp-1076782   | LaMnO <sub>3</sub> | mp-19025    |
| BaCrO <sub>3</sub> * | #04-022-1253 | LaNiO <sub>3</sub> | mp-1075921  |
| BaFeO <sub>3</sub>   | mp-19035     | LaScO <sub>3</sub> | mp-1096800  |
| BaHfO <sub>3</sub>   | mp-998552    | LaTiO <sub>3</sub> | mp-8020     |
| BaMnO <sub>3</sub>   | mp-1016852   | LaVO <sub>3</sub>  | mp-19053    |

<sup>1</sup> E-mail: mihara@chemeng.titech.ac.jp

<sup>2</sup> E-mail: manzhos.s.aa@m.titech.ac.jp

|        |            |         |              |
|--------|------------|---------|--------------|
| BaMoO3 | mp-19322   | NaCrO3  | mp-1076642   |
| BaNbO3 | mp-3020    | NaMoO3  | mp-1040471   |
| BaNiO3 | mp-1120765 | NaNbO3  | mp-3136      |
| BaPbO3 | mp-21280   | NaTaO3  | mp-4170      |
| BaSiO3 | mp-1016821 | NaVO3   | mp-1099591   |
| BaSnO3 | mp-3163    | NaWO3   | mp-19328     |
| BaTaO3 | mp-754678  | NdAlO3  | mp-14254     |
| BaTbO3 | mp-2929    | NdBiO3  | mp-974740    |
| BaTiO3 | mp-2998    | NdCoO3  | mp-20031     |
| BaVO3  | mp-1017465 | NdCrO3  | mp-19062     |
| BaWO3  | mp-1183395 | NdGaO3  | mp-9834      |
| BaZrO3 | mp-3834    | NdInO3  | mp-1186316   |
| CaCoO3 | mp-1099934 | NdTiO3* | #04-002-3783 |
| CaFeO3 | mp-1001571 | NdVO3   | mp-19253     |
| CaHfO3 | mp-1016873 | NdYbO3  | mp-1187576   |
| CaMnO3 | mp-1017467 | PbCrO3  | mp-22364     |
| CaSiO3 | mp-5893    | PbFeO3  | mp-973579    |
| CaSnO3 | mp-7986    | PbHfO3  | mp-22535     |
| CaTiO3 | mp-5827    | PbMnO3  | mp-37214     |
| CaVO3  | mp-1016853 | PbMoO3  | mp-1186106   |
| CaZrO3 | mp-542112  | PbNiO3  | mp-974108    |
| CdHfO3 | mp-1017446 | PbSiO3  | mp-978489    |
| CdMnO3 | mp-1016854 | PbSnO3  | mp-978952    |
| CdSiO3 | mp-1016879 | PbTiO3  | mp-19845     |
| CdSnO3 | mp-1016881 | PbVO3   | mp-1070440   |
| CdTiO3 | mp-22345   | PbZrO3  | mp-1068577   |
| CdVO3  | mp-1016904 | RbCrO3  | mp-1076360   |
| CdZrO3 | mp-1016845 | RbMoO3  | mp-975292    |

|                    |            |                      |              |
|--------------------|------------|----------------------|--------------|
| CeAlO <sub>3</sub> | mp-5323    | RbNbO <sub>3</sub>   | mp-1075911   |
| CeCrO <sub>3</sub> | mp-20530   | RbTaO <sub>3</sub>   | mp-1076534   |
| CeCuO <sub>3</sub> | mp-977389  | RbVO <sub>3</sub>    | mp-1076638   |
| CeFeO <sub>3</sub> | mp-864636  | RbWO <sub>3</sub>    | mp-975138    |
| CeGaO <sub>3</sub> | mp-33365   | SrCoO <sub>3</sub>   | mp-505766    |
| CeMnO <sub>3</sub> | mp-1183706 | SrCrO <sub>3</sub>   | mp-20029     |
| CeNiO <sub>3</sub> | mp-866095  | SrFeO <sub>3</sub>   | mp-510624    |
| CeTiO <sub>3</sub> | mp-754524  | SrHfO <sub>3</sub>   | mp-4551      |
| CeVO <sub>3</sub>  | mp-22593   | SrMnO <sub>3</sub>   | mp-1017466   |
| CsMoO <sub>3</sub> | mp-1183917 | SrMoO <sub>3</sub>   | mp-18747     |
| CsNbO <sub>3</sub> | mp-1096944 | SrNbO <sub>3</sub>   | mp-7006      |
| CsTaO <sub>3</sub> | mp-1185552 | SrNiO <sub>3</sub>   | mp-762506    |
| KCrO <sub>3</sub>  | mp-1076732 | SrPbO <sub>3</sub> * | #04-008-0331 |
| KMoO <sub>3</sub>  | mp-1040469 | SrSiO <sub>3</sub>   | mp-1017439   |
| KNbO <sub>3</sub>  | mp-935811  | SrSnO <sub>3</sub>   | mp-546973    |
| KTaO <sub>3</sub>  | mp-3614    | SrTaO <sub>3</sub>   | mp-1186755   |
| KVO <sub>3</sub>   | mp-1076633 | SrTiO <sub>3</sub>   | mp-5229      |
| KWO <sub>3</sub>   | mp-1040472 | SrVO <sub>3</sub>    | mp-18717     |
| LaAgO <sub>3</sub> | mp-1076000 | SrWO <sub>3</sub>    | mp-1186764   |
| LaAlO <sub>3</sub> | mp-5304    | SrZrO <sub>3</sub>   | mp-613402    |
| LaCoO <sub>3</sub> | mp-573180  | TlNbO <sub>3</sub>   | mp-977408    |
| LaCrO <sub>3</sub> | mp-18841   | TlTaO <sub>3</sub>   | mp-861873    |
| LaCuO <sub>3</sub> | mp-1076070 | TlWO <sub>3</sub>    | mp-1187621   |
| LaFeO <sub>3</sub> | mp-552676  |                      |              |

## 2 List of spinel structures used

| Material | Database ID | Material | Database ID |
|----------|-------------|----------|-------------|
| BaLa2O4  | mp-755558   | MgCu2O4  | mvc-4609    |
| BeCo2O4  | mp-770957   | MgFe2O4  | mp-608016   |
| CaAg2O4  | mvc-4692    | MgGa2O4  | mp-4590     |
| CaBi2O4  | mvc-4662    | MgIn2O4  | mp-7831     |
| CaCo2O4  | mvc-11995   | MgMn2O4  | mvc-15009   |
| CaCr2O4  | mp-1304962  | MgMo2O4  | mvc-4795    |
| CaCu2O4  | mvc-4685    | MgNi2O4  | mp-1319349  |
| CaFe2O4  | mvc-13150   | MgRh2O4  | mp-3319     |
| CaGd2O4  | mp-752679   | MgSb2O4  | mvc-4678    |
| CaIn2O4  | mp-22766    | MgTi2O4  | mp-27872    |
| CaMo2O4  | mp-1539672  | MgV2O4   | mp-18900    |
| CaNi2O4  | mp-1273583  | MnAl2O4  | mp-755882   |
| CaSb2O4  | mvc-4658    | MnCo2O4  | mp-1222025  |
| CaSm2O4  | mp-754240   | MnCr2O4  | mp-28226    |
| CaTb2O4  | mp-755044   | MnFe2O4  | mp-18750    |
| CaTi2O4  | mvc-6014    | MnIn2O4  | mp-35162    |
| CaTm2O4  | mp-1178472  | MnRh2O4  | mp-554354   |
| CaV2O4   | mvc-11563   | MnTi2O4  | mp-561097   |
| CaY2O4   | mp-753815   | MnV2O4   | mp-35475    |
| CdAl2O4  | mp-36866    | MoAg2O4  | mp-19318    |
| CdCo2O4  | mp-756301   | MoNa2O4  | mp-18852    |
| CdCr2O4  | mp-19262    | NiAl2O4  | mp-688785   |
| CdFe2O4  | mp-21333    | NiCo2O4  | mp-1096547  |
| CdGa2O4  | mp-3443     | NiCr2O4  | mp-19303    |
| CdGd2O4  | mp-754093   | NiFe2O4  | mp-22684    |
| CdIn2O4  | mp-19803    | NiGa2O4  | mp-756649   |
| CdRh2O4  | mp-14100    | NiMn2O4  | mp-29399    |

|         |            |         |            |
|---------|------------|---------|------------|
| CdV2O4  | mp-18847   | NiRh2O4 | mp-19307   |
| CoAl2O4 | mp-36447   | PdNd2O4 | mp-1210248 |
| CoCr2O4 | mp-20758   | PdZn2O4 | mp-22257   |
| CoFe2O4 | mp-753222  | SiCd2O4 | mp-560842  |
| CoGa2O4 | mp-765466  | SiCo2O4 | mp-19071   |
| CoMg2O4 | mp-753991  | SiFe2O4 | mp-18816   |
| CoNi2O4 | mp-754168  | SiMg2O4 | mp-5639    |
| CoRh2O4 | mp-546936  | SiNi2O4 | mp-18766   |
| CoV2O4  | mp-758452  | SiV2O4  | mp-754234  |
| CuAl2O4 | mp-27719   | SiZn2O4 | mp-558096  |
| CuCo2O4 | mp-34146   | SnCd2O4 | mp-1104726 |
| CuCr2O4 | mp-504573  | SnMg2O4 | mp-973261  |
| CuFe2O4 | mp-770107  | SnZn2O4 | mp-1103830 |
| CuGa2O4 | mp-753397  | SrLa2O4 | mp-754211  |
| CuMn2O4 | mp-505421  | SrLu2O4 | mp-756646  |
| CuNi2O4 | mp-756271  | SrNd2O4 | mp-753418  |
| CuRh2O4 | mp-4409    | SrSc2O4 | mp-754114  |
| EuLa2O4 | mp-1178267 | SrSm2O4 | mp-754942  |
| EuY2O4  | mp-754557  | VCr2O4  | mp-754077  |
| FeAl2O4 | mp-30084   | VMg2O4  | mp-30545   |
| FeCr2O4 | mp-20168   | WNa2O4  | mp-18803   |
| FeMg2O4 | mp-768465  | ZnAg2O4 | mvc-4660   |
| FeNi2O4 | mp-640147  | ZnAl2O4 | mp-2908    |
| FeV2O4  | mp-20167   | ZnBi2O4 | mvc-4703   |
| GeMg2O4 | mp-3904    | ZnCo2O4 | mp-753489  |
| HgAl2O4 | mp-756317  | ZnCr2O4 | mp-19410   |
| HgCo2O4 | mp-754069  | ZnCu2O4 | mvc-4675   |
| HgCr2O4 | mp-21074   | ZnFe2O4 | mp-19313   |

|                                  |           |                                  |           |
|----------------------------------|-----------|----------------------------------|-----------|
| HgFe <sub>2</sub> O <sub>4</sub> | mp-754491 | ZnGa <sub>2</sub> O <sub>4</sub> | mp-5794   |
| HgGa <sub>2</sub> O <sub>4</sub> | mp-755239 | ZnIn <sub>2</sub> O <sub>4</sub> | mp-756297 |
| HgIn <sub>2</sub> O <sub>4</sub> | mp-753983 | ZnMn <sub>2</sub> O <sub>4</sub> | mvc-11612 |
| HgY <sub>2</sub> O <sub>4</sub>  | mp-755634 | ZnMo <sub>2</sub> O <sub>4</sub> | mvc-4829  |
| MgAg <sub>2</sub> O <sub>4</sub> | mvc-4630  | ZnNi <sub>2</sub> O <sub>4</sub> | mp-768586 |
| MgAl <sub>2</sub> O <sub>4</sub> | mp-3536   | ZnRh <sub>2</sub> O <sub>4</sub> | mp-5146   |
| MgBi <sub>2</sub> O <sub>4</sub> | mvc-4682  | ZnSb <sub>2</sub> O <sub>4</sub> | mvc-4661  |
| MgCo <sub>2</sub> O <sub>4</sub> | mp-756442 | ZnTi <sub>2</sub> O <sub>4</sub> | mvc-5983  |
| MgCr <sub>2</sub> O <sub>4</sub> | mp-19202  | ZnV <sub>2</sub> O <sub>4</sub>  | mp-18879  |

## References

1. Gates-Rector, S., Blanton, T.: The Powder Diffraction File: a quality materials characterization database. Powder Diffraction. 34, 352–360 (2019). <https://doi.org/10.1017/S0885715619000812>
2. Jain, A., Ong, S.P., Hautier, G., Chen, W., Richards, W.D., Dacek, S., Cholia, S., Gunter, D., Skinner, D., Ceder, G., Persson, K.A.: Commentary: The Materials Project: A materials genome approach to accelerating materials innovation. APL Mater. 1, 011002 (2013). <https://doi.org/10.1063/1.4812323>
